# Supplementary material for: Autonomous DNA nanostructures instructed by hierarchically concatenated chemical reaction networks
Source: PubMed Central journal article supplement (PMC8390752; doi:10.1038/s41467-021-25450-5), 2021-08-26
Supplement: 41467_2021_25450_MOESM1_ESM.pdf [file 41467_2021_25450_MOESM1_ESM.pdf]

Supplementary Information for

# **Autonomous DNA nanostructures instructed by hierarchically concatenated chemical reaction networks**

Jie Deng<sup>1,3\*</sup> and Andreas Walther<sup>1,2\*</sup>

<sup>1</sup> A<sup>3</sup>BMS Lab, Department of Chemistry, University of Mainz, Duesbergweg 10-14, 55128 Mainz, Germany

<sup>2</sup> Cluster of Excellence livMatS @ FIT – Freiburg Center for Interactive Materials and Bioinspired Technologies, University of Freiburg, Georges-Köhler-Allee 105, D-79110 Freiburg, Germany

<sup>3</sup> Present address: Department of Cancer Biology, Dana-Farber Cancer Institute, Harvard Medical School, Boston, MA 02115, USA

E-mail: andreas.walther@uni-mainz.de; jie\_deng@dfci.harvard.edu

## Materials

**Instrumentation:** ThermoMixer (Eppendorf), thermocycler Tpersonal (Analytik Jena), INTAS CHEMOSTAR touch fluorescence imager (INTAS Science Imaging), gel electrophoresis chambers (biostep), Enduro power supply 300 V (Labnet International, Inc.), ScanDropR UV-VIS spectrometer (Analytik Jena), confocal laser scanning microscopy (Leica TCS SP8, Mannheim), and Spark® multimode microplate reader (Tecan).

**Reagents:** T4 DNA ligase (HC, 20 Weiss units (WU)  $\mu\text{L}^{-1}$ , recombinant *E. coli* strain) was supplied by Promega and Bsal-HF<sup>®</sup>v2 (20 units (U)  $\mu\text{L}^{-1}$ , NEB #R3733) and 10× CutSmart<sup>®</sup> Buffer were ordered from New England Biolabs (NEB). ATP solution (10 mM in 1 mM Tris-HCl pH 7.5) was purchased from Invitrogen. Agarose low EEO was supplied by PanReac AppliChem. Gene ruler 50 bp DNA ladder (ready to use), and DNA gel loading dye (6×) were supplied by ThermoFisher Scientific. Ethylenediaminetetraacetic acid disodium salt dihydrate (EDTA, biology grade) was supplied by CALBIOCHEM. Sodium chloride (NaCl, 99%), hexadecane (99%), tris (hydroxymethyl)aminomethane hydrochloride pH 8.0 (Tris-HCl), trizma base, magnesium chloride solution (2 M in H<sub>2</sub>O, BioUltra), BRAND<sup>®</sup> cover glass (0.13-0.17 mm, No. 1, L × W 24 mm × 60 mm, rectangular), and 24-well silicone isolators (press-to-seal, 2 mm diameter, 0.6 mm depth) were ordered from Sigma-Aldrich. Acetic acid glacial (ACS, Reag. Ph. Eur. Analytical reagents) was supplied by VWR Chemicals. RotiR-GelStain (1,1'3,3',5,5'6,6'-Octamethyl-2,2'-spiro(2,3-dihydro-1H-Benzimidazol) was supplied by Carl Roth. All oligonucleotides purified by high-performance liquid chromatography were supplied by Integrated DNA Technologies Inc., and the sequences and modifications are shown below.

### Buffer compositions

*T4 DNA Ligase Storage Buffer (Promega):* 10 mM Tris-HCl (pH 7.4 at 25 °C), 50 mM KCl, 1 mM dithiothreitol (DTT), 0.1 mM EDTA, 50% glycerol.

*Bsal-HF<sup>®</sup>v2 storage buffer (NEB):* 10 mM Tris-HCl, 200 mM NaCl, 1 mM DTT, 0.1 mM EDTA, 200  $\mu\text{g}/\text{mL}$  BSA, 50% glycerol.

*NEB CutSmart<sup>®</sup> Buffer:* 50 mM potassium acetate, 20 mM Tris-acetate, 10 mM magnesium acetate, 100  $\mu\text{g mL}^{-1}$  BSA.

*Annealing Buffer:* 10 mM Tris-HCl (pH 8.0), 50 mM NaCl.

*TAE Buffer:* 40 mM Tris, 20 mM acetic acid, 1 mM EDTA.

*Quenching Buffer:* 200 mM EDTA, 10 mM Tris-HCl (pH 8.0), 50 mM NaCl.

Tris Acetate-EDTA (TAE)/Mg<sup>2+</sup>: 40 mM Tris, 20 mM acetic acid, 1 mM EDTA, 12.4 mM MgCl<sub>2</sub>, pH 8.0.

Milli-Q water was used throughout of this study.

**Supplementary Table 1:** Oligonucleotide sequences used, with their name in individual Figure, the sequence codes used for ordering at IDT.

|                    | Name                     | Oligonucleotide sequence (5'-3')                        | #nt |
|--------------------|--------------------------|---------------------------------------------------------|-----|
| Fig. 2-4, 6, 7, S2 | Complex 1                | CATGAGAATTCCATTCACGGTCTCT                               | 25  |
|                    |                          | /5Phos/GATTAGAGACCGTGAATGGAATTCTCATG                    | 29  |
| Fig. 2- 4          | Substrate 1              | CGGATTGGTATTGTATTA                                      | 18  |
|                    |                          | /5Phos/AATCTTTAATACAATACCAATCCGATT                      | 27  |
|                    | Input 1                  | /5Phos/AATCAATCGGA                                      | 11  |
|                    | Input 2                  | GTATTA                                                  | 8   |
| Fig. 2             | Substrate 2              | /5IAbRQ/CGGATTGGTATTGTATTA/3Cy5/                        | 18  |
|                    |                          | /5Phos/AATCTTTAATACAATACCAATCCGATT                      | 27  |
| Fig. 3             | Substrate 3              | TTGGTATTGTC/3Cy5/                                       | 11  |
|                    |                          | /5IAbRQ/GACAATACCAATCCG                                 | 15  |
| Fig. S2            | Substrate 4              | CGGATTGGATCTATTGTATTA                                   | 21  |
|                    |                          | /5Phos/AATCCTTTAATACAATAGATCCAATCCGATT                  | 31  |
|                    | Substrate 5              | TTGGATCTATTGTC/3Cy5/                                    | 14  |
|                    |                          | /5IAbRQ/GACAATAGATCCAATCCG                              | 18  |
|                    | Input 3                  | /5Phos/AATCAATCGGAT                                     | 12  |
|                    | Input 4                  | TGTATTAAG                                               | 10  |
| Fig. 4, 6, 7       | S 1                      | CTCAGTGGACAGCCGTTCTGGAGCGTTGGACGAAACT                   | 37  |
| Fig. 4             | S 2                      | TTGGTATTGTCTGGTAGAGCACCAGTGGAGGTA                       | 34  |
| Fig. 4, 6, 7       | S 3                      | /5ATTO488NN/TCCAGAACGGCTGTGGCTAAACAGTAACCGAAGCACCAACGCT | 43  |
|                    | S 4                      | CAGACAGTTTCGTGGTCATCGTACCT                              | 26  |
|                    | S 5                      | CGATGACCTGCTTCGGTACTGTTAGCTGCTCTAC                      | 37  |
| Fig. 4             | Inhibitor 1              | GACAATACCAATCCG                                         | 15  |
|                    | Activator<br>(=Output 1) | CGGATTGGTATTGTATTA                                      | 18  |
|                    | Deactivator              | /5Phos/AATCTTTAATACAATACCAATCCGATT                      | 27  |
| Fig. 6, 7          | S 2*                     | /5Phos/AATCTTATGTTTGTATTGTCTGGTAGAGCACCAGTGGAGGTA       | 43  |
|                    | Inhibitor 2              | GACAATACAAACAT                                          | 14  |
|                    | Input 5                  | AAACATAA                                                | 8   |
| Fig. 7             | S 1-#2                   | ACGGATCCTGATAGCGAGACCTAGCAACCTGAAACCA                   | 37  |
|                    | S 2-#2                   | /5Phos/AATCGTATGTTTGTATTCTGTCTACTCGTGGATCCGTTGGTAT      | 43  |
|                    | S 3-#2                   | /5ATTO647NN/AGAATTGCGTCGTGGTTGCTAGGTCCTCGCTATCACCGATGTG | 42  |
|                    | S 4-#2                   | GACAGTGGTTTCACCTGAACGATACC                              | 26  |
|                    | S 5-#2                   | CGTTCAGGACGACGCAATTCTCACATCGGACGAGTAG                   | 37  |
|                    | Inhibitor 3              | CAGAATACAAACAT                                          | 14  |
|                    | Input 6                  | AAACATAC                                                | 8   |

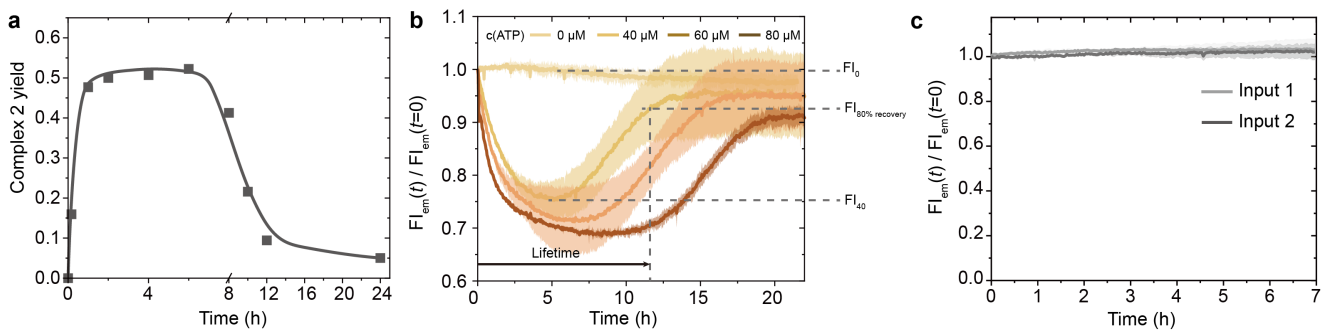

**Supplementary Fig. 1. ATP-fueled transient DSD.** (a) Time-dependent yield of Complex 2 in the ATP-fueled transient DSD quantified from AGE data using the equation above. Line is a guide to the eye. (b) Illustration of data treatment for determine the lifetime for ATP-fueled transient DSD. FI represents fluorescence intensity. (c) ATP-fueled DSD for transient allosteric switch triggered by Input 1 or Input 2. Conditions: (a) 25 °C, 20  $\mu$ M Complex 1, 5  $\mu$ M Substrate 1, 10  $\mu$ M Input 1, 10  $\mu$ M Input 2, 0.8 WU  $\mu$ L<sup>-1</sup> T4 DNA ligase, 1.5 U  $\mu$ L<sup>-1</sup> Bsal, and 40  $\mu$ M ATP. (c) 25 °C, 20  $\mu$ M Complex 1, 5  $\mu$ M Substrate 2, 0.8 WU  $\mu$ L<sup>-1</sup> T4 DNA ligase, 1.5 U  $\mu$ L<sup>-1</sup> Bsal, 40  $\mu$ M ATP, and 10  $\mu$ M Input 1 or 10  $\mu$ M Input 2.

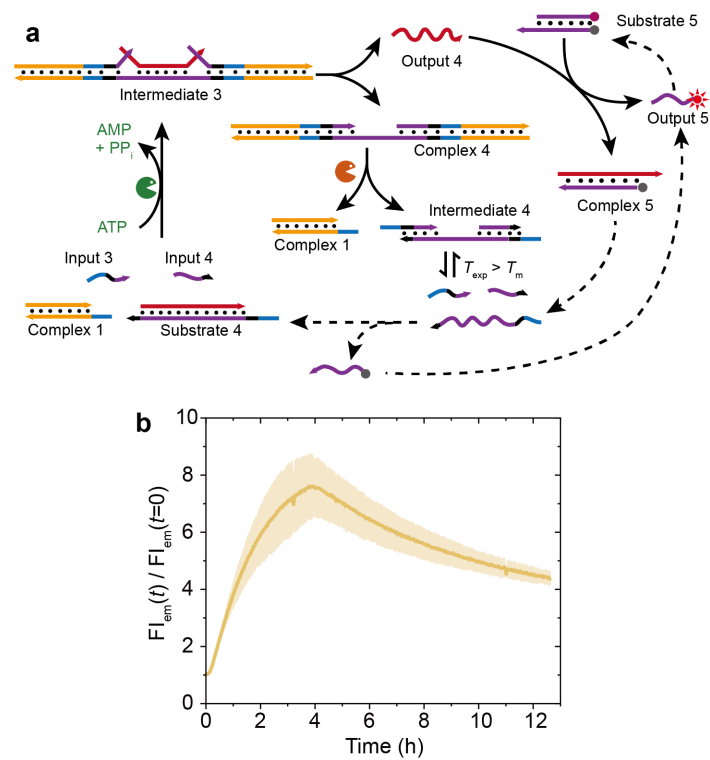

**Supplementary Fig. 2. ATP-fueled transient DSD cascades at 37 °C.** (a) Schematic representation of ATP-fueled transient DSD cascades. (b) Time-dependent FI for monitoring ATP-fueled transient DSD cascades by substrate 5 with one equivalent amount of quencher strand. Conditions: 37 °C, 20  $\mu$ M Complex 1, 5  $\mu$ M Substrate 4, 1  $\mu$ M Substrate 5 (with one equivalent amount of quencher strand), 10  $\mu$ M Input 3, 10  $\mu$ M Input 4, 0.8 WU  $\mu$ L<sup>-1</sup> T4 DNA ligase, 1.5 U  $\mu$ L<sup>-1</sup> BsaI, and 40  $\mu$ M ATP.

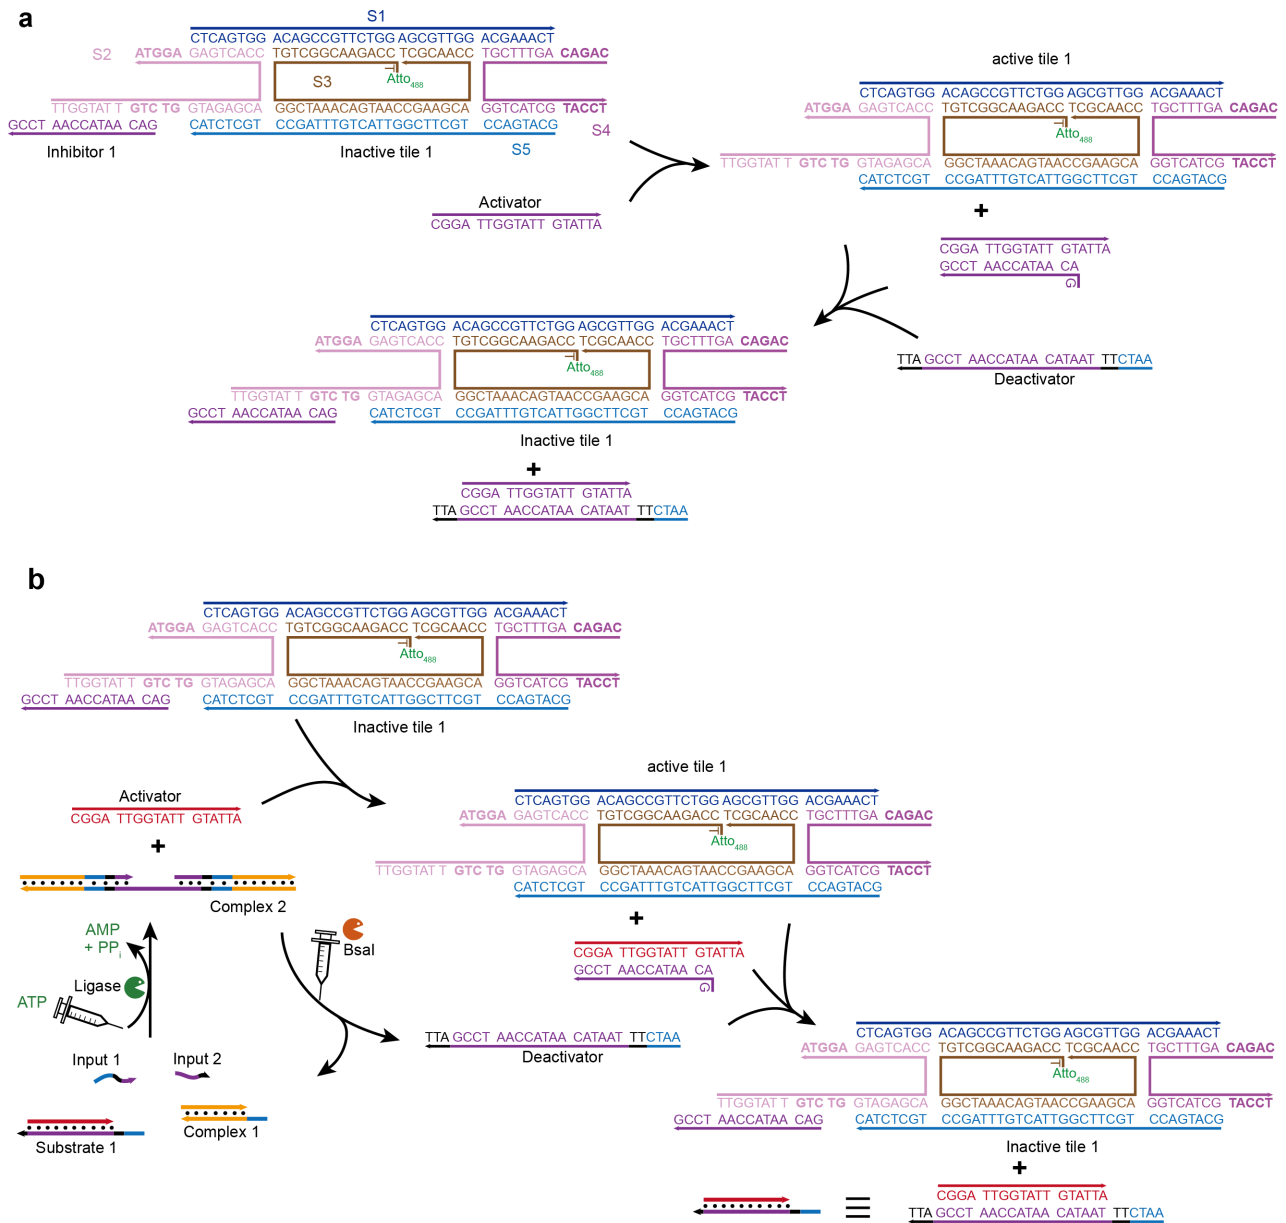

**Supplementary Fig. 3. Illustration of reversible tile activation and deactivation reactions. (a)** Schematic representation of Inactive tile 1 annealed from S 1, S 2, S 3, S 4, S 5, and Inhibitor 1, and its activation and deactivation by Activator and Deactivator, respectively. **(b)** Schematic representation of ATP-powered ligation induced tile activation and later on BsaI restriction induced tile deactivation.

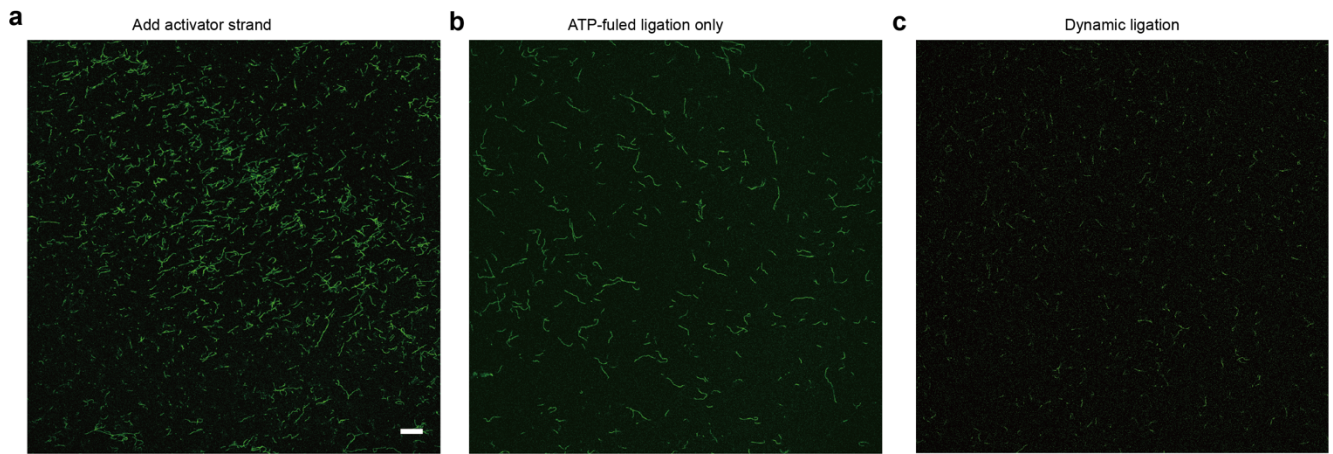

**Supplementary Fig. 4. Zoomed-out confocal laser scanning microscopy (CLSM) images of assembled DNA nanotubes (DNTs) to show larger field of view. (a)** Representative CLSM image of DNT self-assembly activated by adding Activator strand (30 min reaction time at 25 °C). **(b)** Representative CLSM image of DNT self-assembly triggered by ATP-fueled ligation only (2 h reaction time at 25 °C). **(c)** Representative CLSM image of DNT self-assembly in an enzymatic reaction network of concurrent ATP-powered ligation and restriction (2 h reaction time at 25 °C). Scale bar = 10  $\mu\text{m}$ .

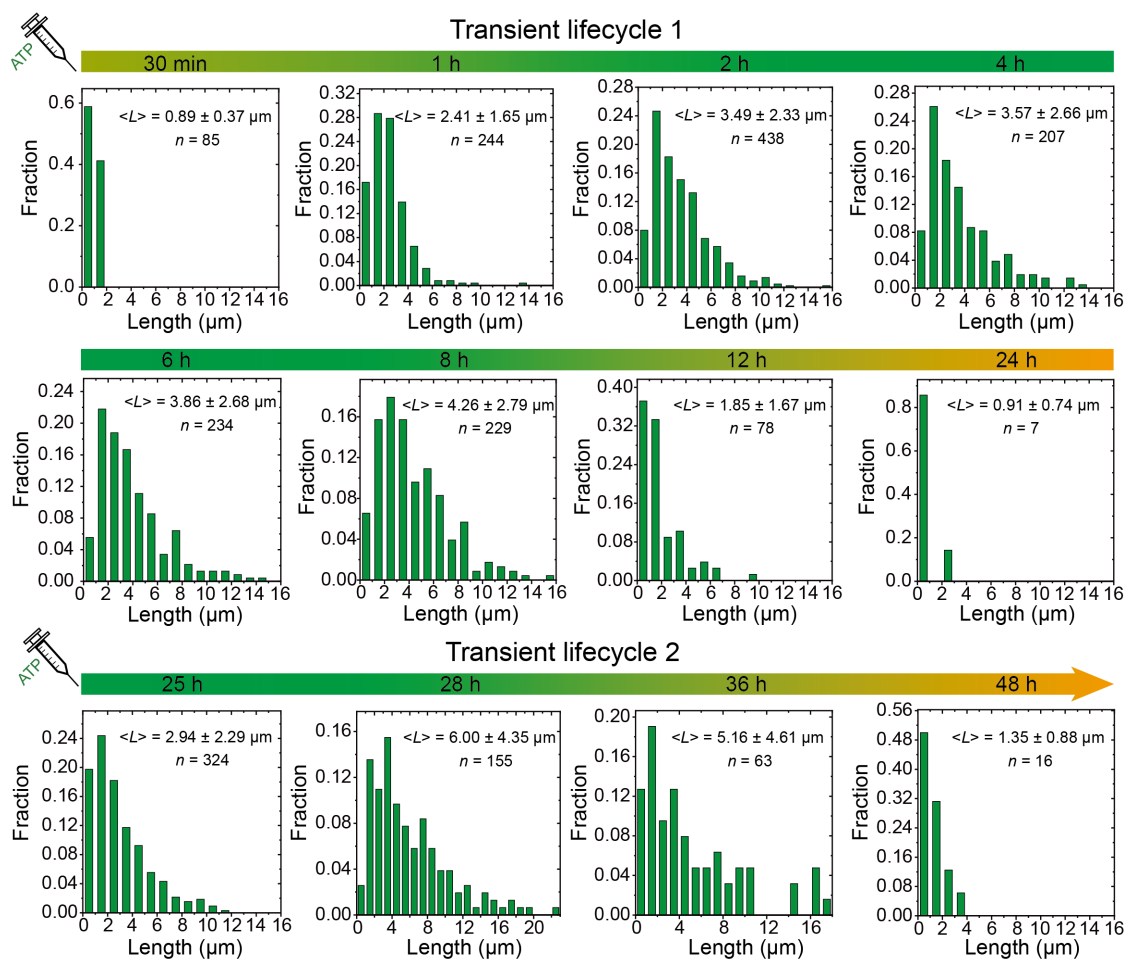

**Supplementary Fig. 5. Histograms of nanotube length measured from CLSM images.** Time-dependent length distribution of the ATP-fueled transient DNTs.  $\langle L \rangle$  indicates mean nanotube length.



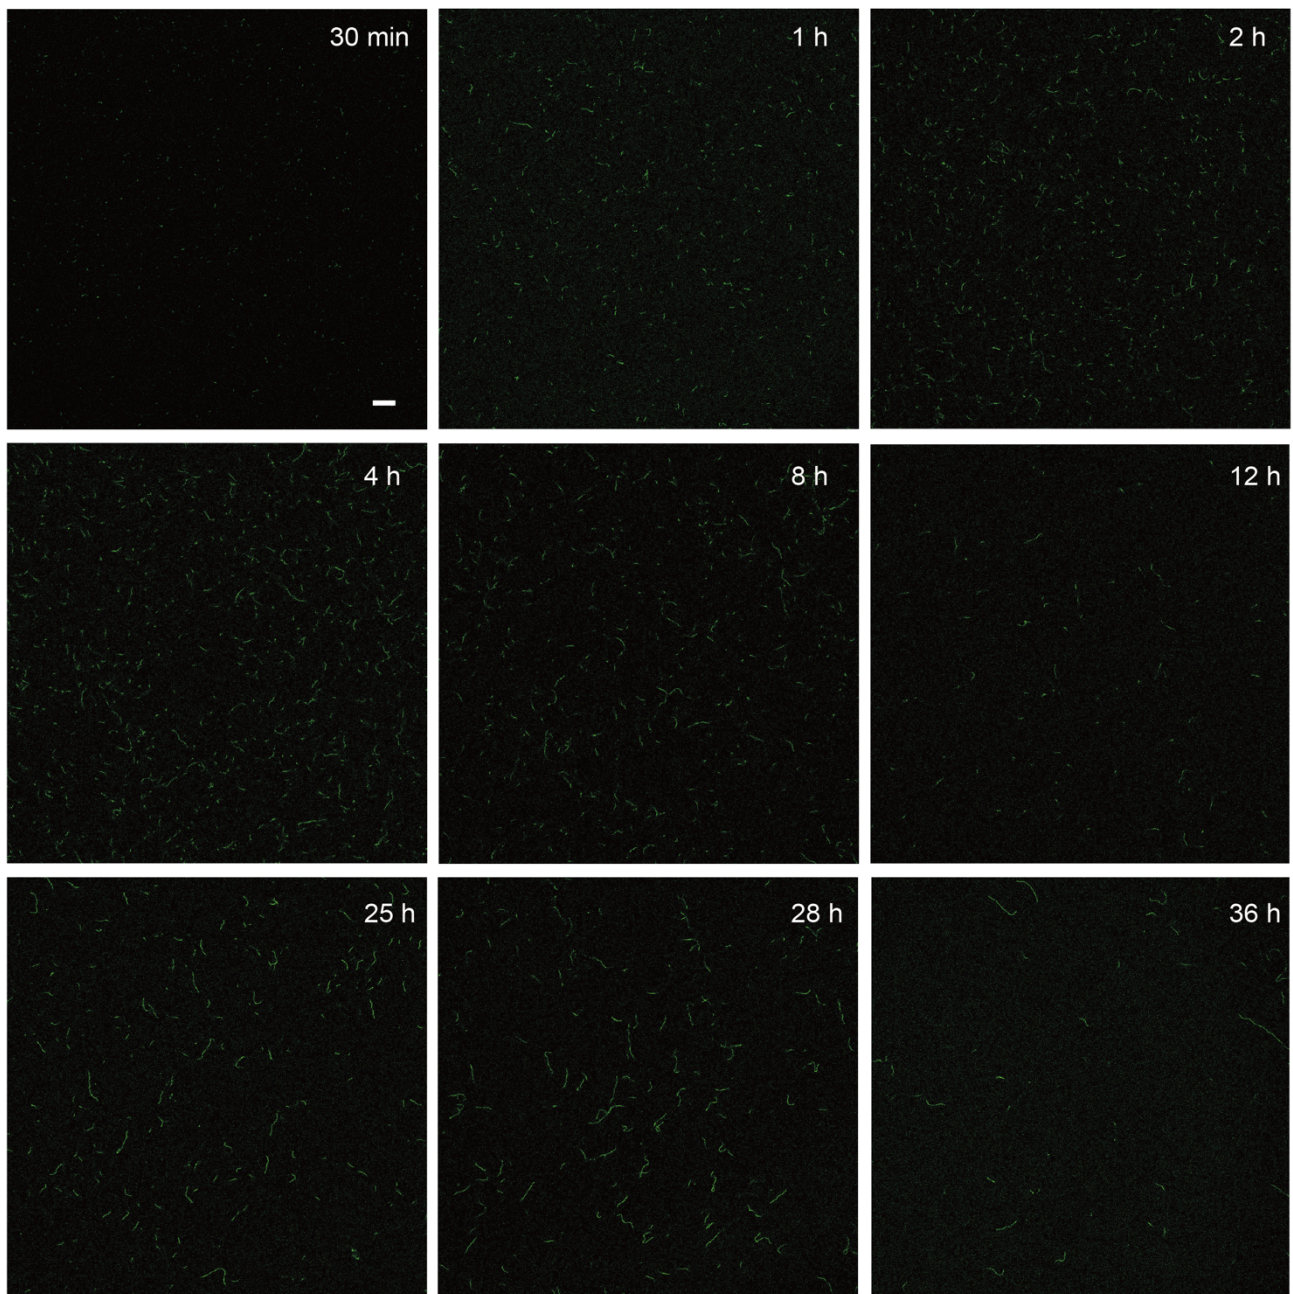

**Supplementary Fig. 6. Zoomed-out CLSM images of ATP-fueled transient DNT self-assembly.** Time-dependent representative CLSM images of ATP-fueled transient DNTs. Scale bar = 10  $\mu\text{m}$ . Conditions: 25  $^{\circ}\text{C}$ , 0.5  $\mu\text{M}$  Inactive tile 1 (0.5  $\mu\text{M}$  tile + 1  $\mu\text{M}$  Inhibitor), 20  $\mu\text{M}$  Complex 1, 5  $\mu\text{M}$  Substrate 1, 10  $\mu\text{M}$  Input 1, 10  $\mu\text{M}$  Input 2, 0.8 WU  $\mu\text{L}^{-1}$  T4 DNA ligase, 1.5 U  $\mu\text{L}^{-1}$  Bsal, and 40  $\mu\text{M}$  ATP. At 24 h, another 40  $\mu\text{M}$  ATP was added to initiate the second transient lifecycle.

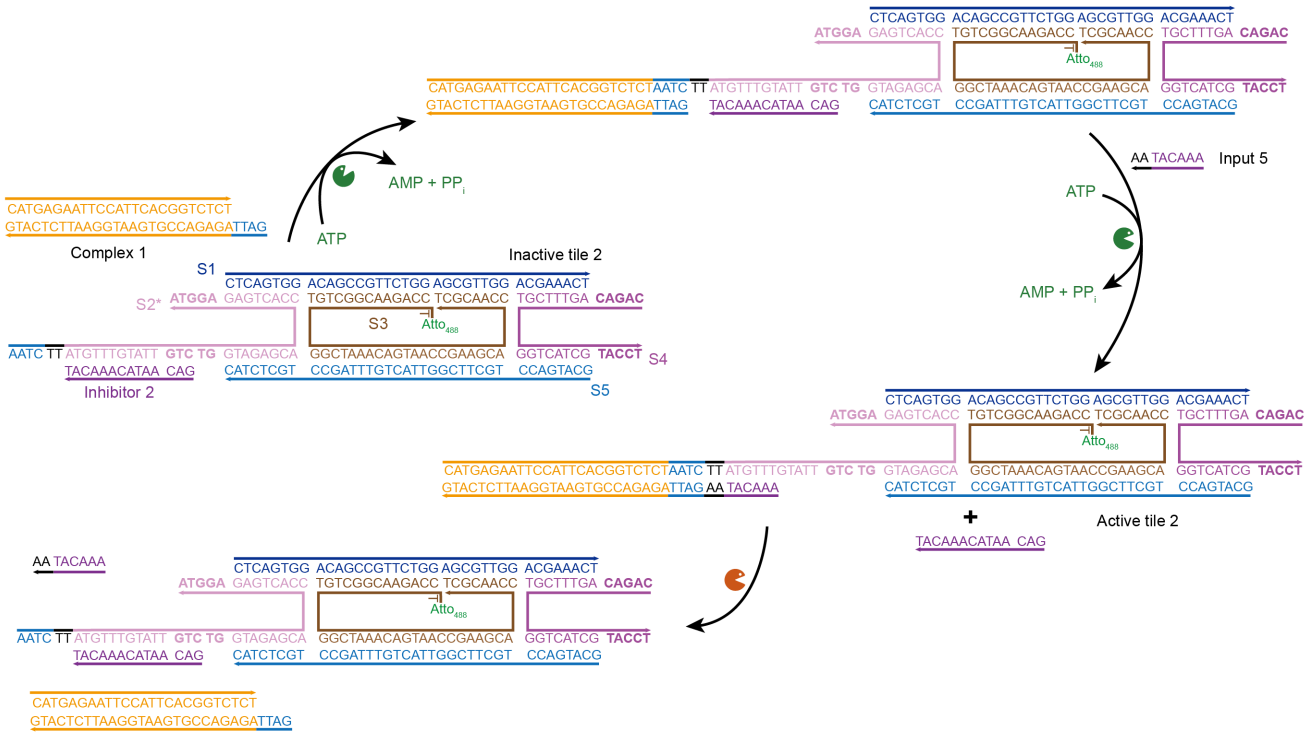

**Supplementary Fig. 7. Illustration of temporal tile activation via direct ATP-powered transient ligation on tile.** Schematic representation of Inactive tile 2 annealed from S 1, S 2\*, S 3, S 4, S 5, and Inhibitor 2, and its activation by two consecutive steps ligation with Complex 1 and Input 5. The BsaI restriction can simultaneously deactivate the activated tile to regenerate Inactive tile 2, Complex 1, and Input 5.

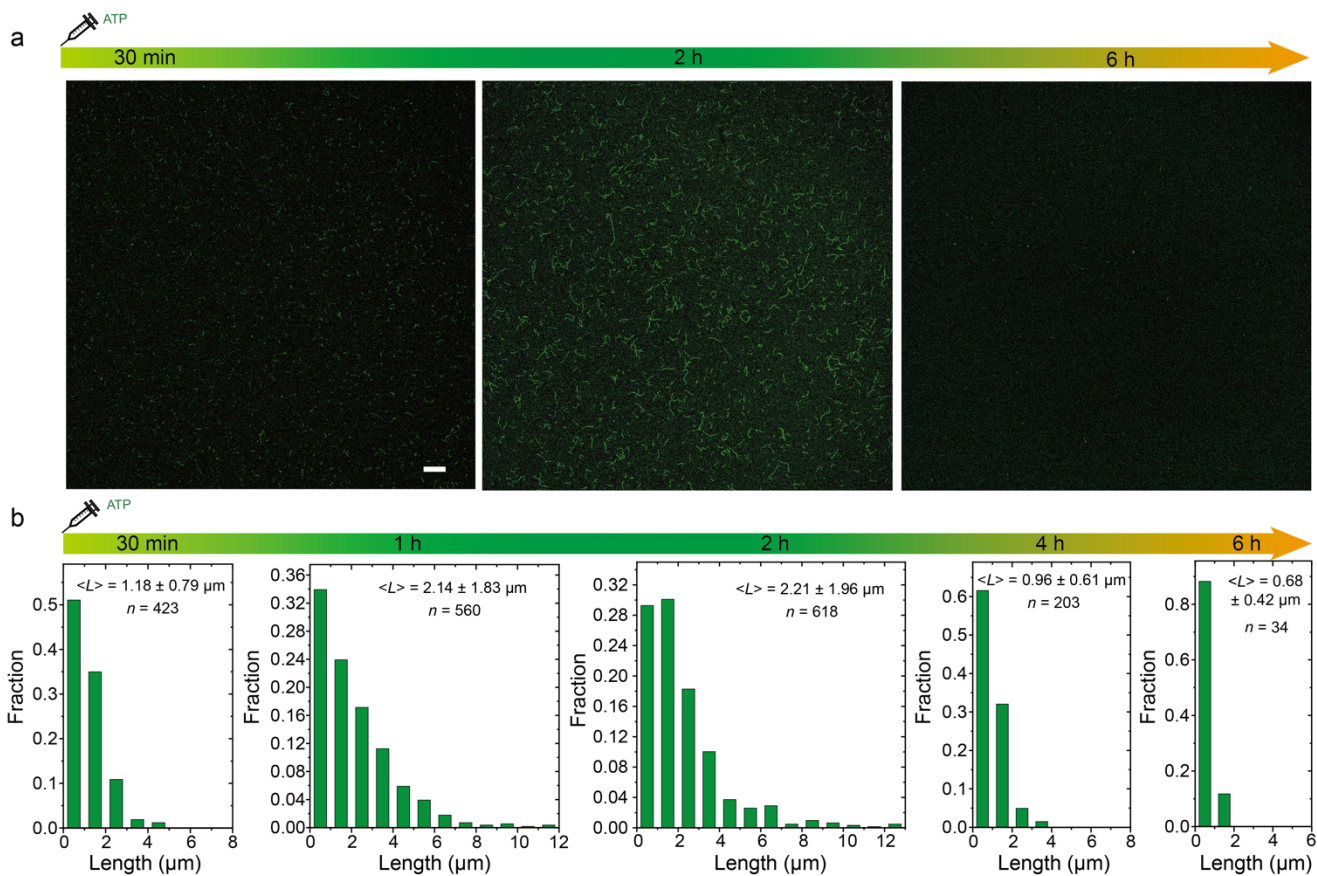

**Supplementary Fig. 8. ATP-fueled transient DNT by direct ATP-powered transient ligation on assembling tile.**

(a) Time-dependent representative CLSM images of ATP-fueled transient DNTs. Scale bar = 10  $\mu\text{m}$ . (b) Time-dependent length distribution of the ATP-fueled transient DNTs measured from CLSM images.  $\langle L \rangle$  indicates mean nanotube length. Conditions: 25  $^{\circ}\text{C}$ , 1  $\mu\text{M}$  Inactive tile 2 (1  $\mu\text{M}$  tile + 1  $\mu\text{M}$  Inhibitor), 5  $\mu\text{M}$  Complex 1, 5  $\mu\text{M}$  Input 5, 0.8  $\text{WU } \mu\text{L}^{-1}$  T4 DNA ligase, 1.5  $\text{U } \mu\text{L}^{-1}$  Bsal, and 8  $\mu\text{M}$  ATP.

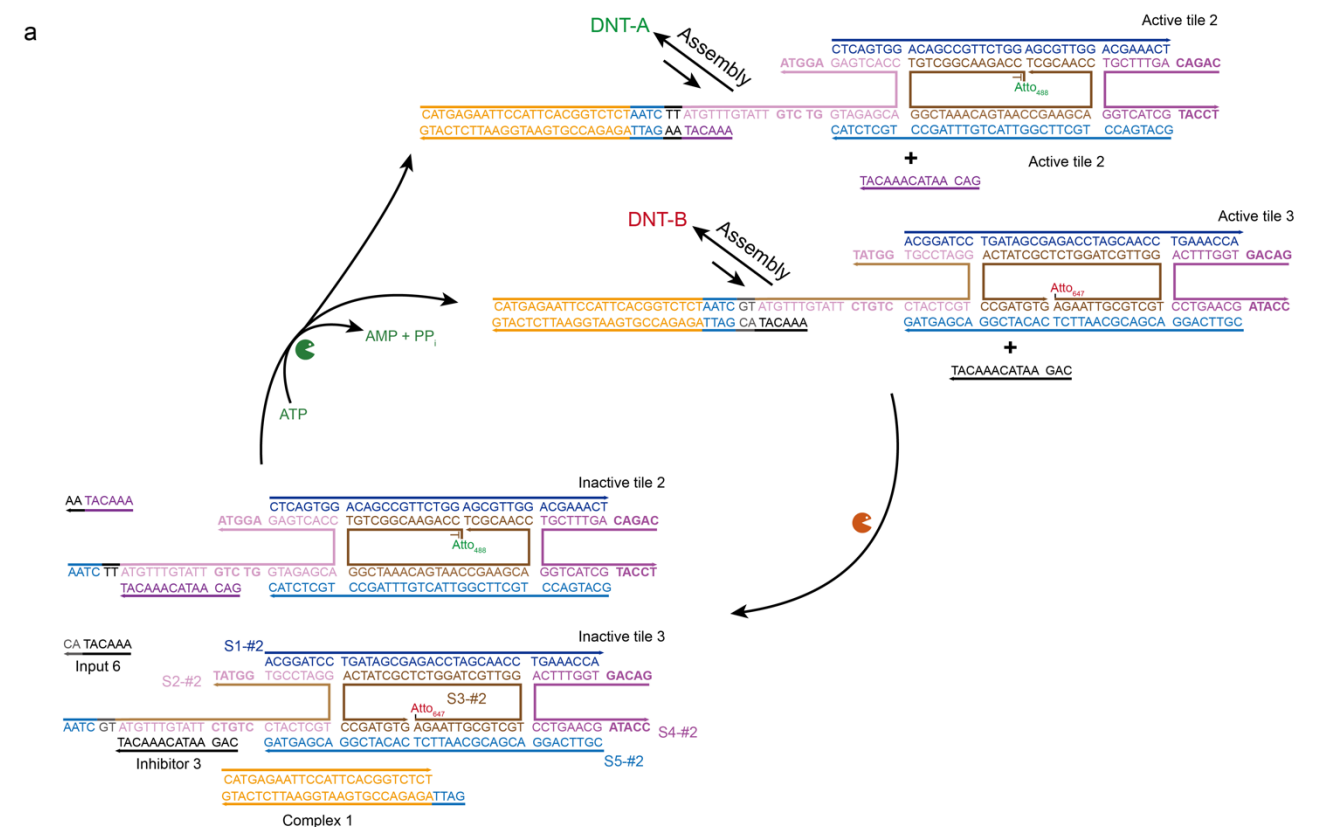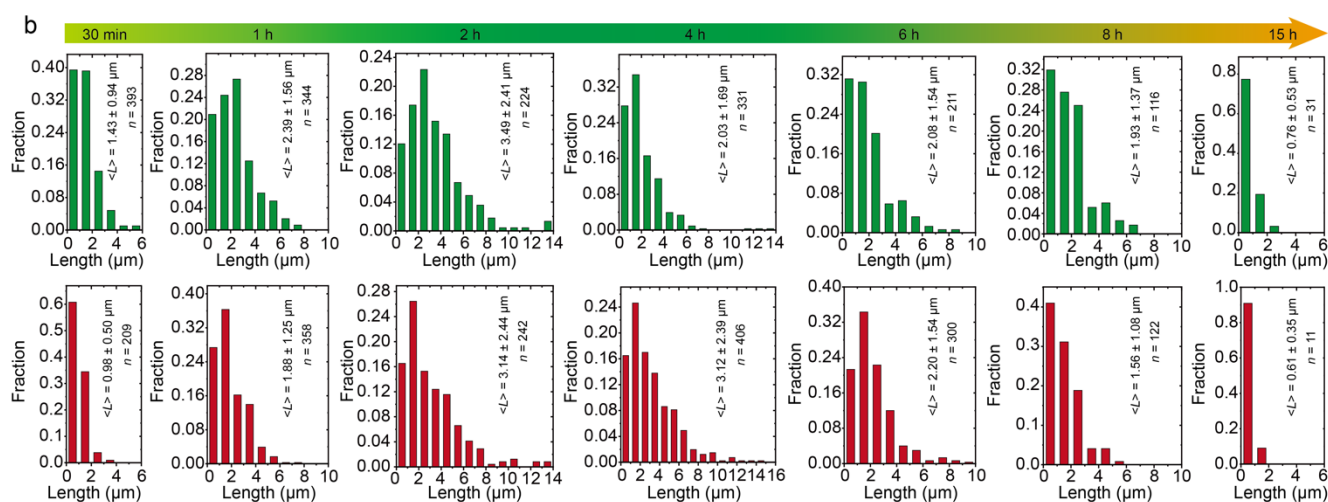

**Supplementary Fig. 9. ATP-fueled transient self-sorting DNTs.** (a) Illustration of ATP-fueled transient activation of Inactive tile 2 and Inactive tile 3 for the assemblies of DNT-A and DNT-B, respectively. Inactive tile 2 was annealed from S 1, S 2\*, S 3, S 4, S 5, and Inhibitor 2. Inactive tile 3 was annealed from S 1-#2, S 2-#2, S 3-#2, S 4-#2, S 5-#2, and Inhibitor 3. (b) Histograms of nanotube length measured from CLSM images show the time-dependent length distribution of the ATP-fueled transient DNTs. The green and red histograms represent the nanotube length of DNT-A and DNT-B, respectively.  $\langle L \rangle$  indicates mean nanotube length. Conditions: 25 °C, 1  $\mu$ M Inactive tile 2 (1  $\mu$ M tile + 1  $\mu$ M Inhibitor), 1  $\mu$ M Inactive tile 3 (1  $\mu$ M tile + 1  $\mu$ M Inhibitor) 10  $\mu$ M Complex 1, 5  $\mu$ M Input 5, 5  $\mu$ M Input 6, 0.8 WU  $\mu$ L<sup>-1</sup> T4 DNA ligase, 1.5 U  $\mu$ L<sup>-1</sup> Bsal, and 16  $\mu$ M ATP.
